# Supplementary material
Source: PubMed Central journal article supplement (PMC1859967)

Si/C

P/C

Si-P/Si

Si-P/P

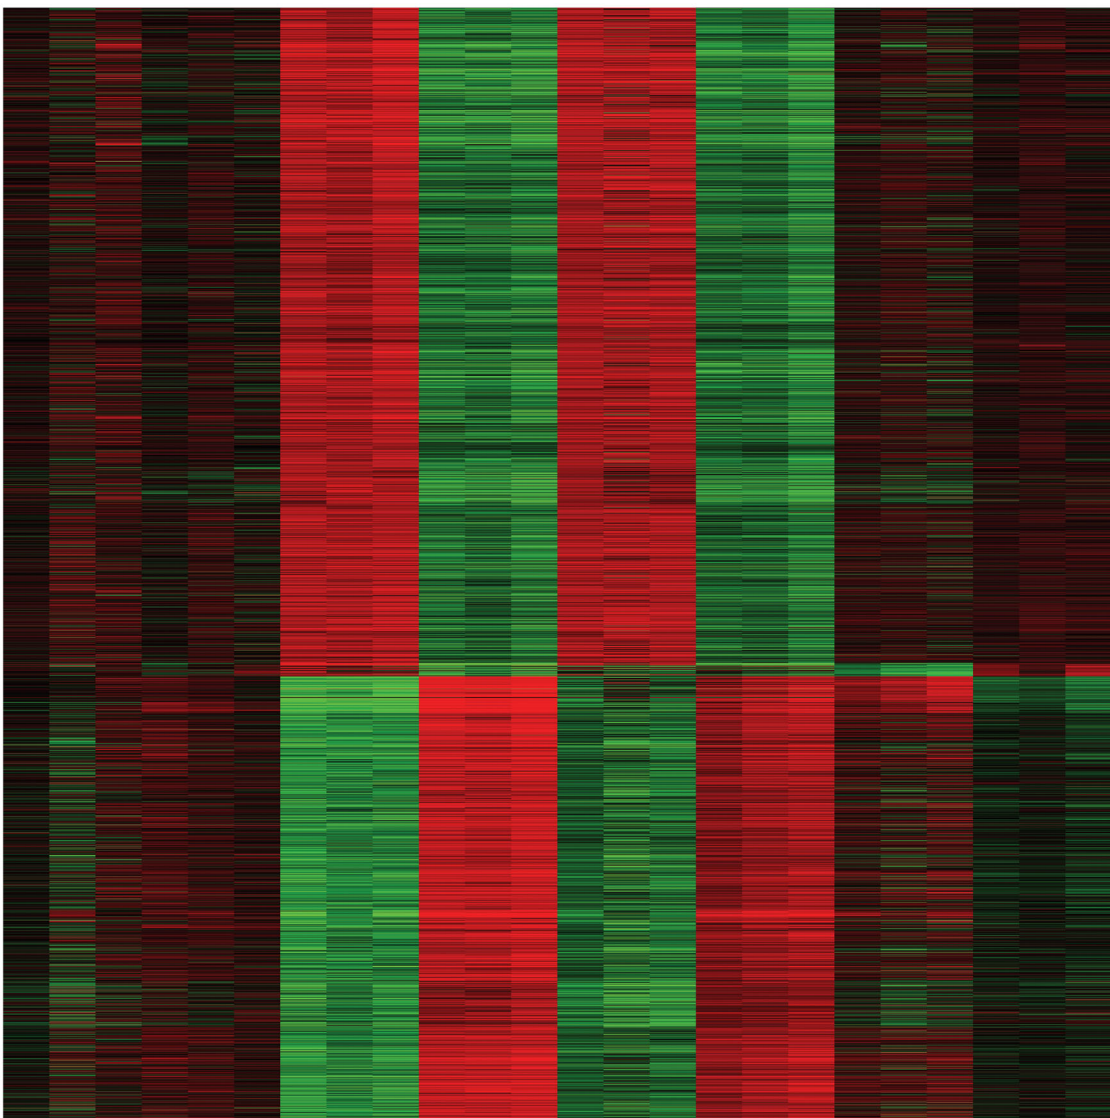

-2.0

0.0

2.0

Supplement: pnas_0606330103_1.pdf [file pnas_0606330103_1.pdf]
